# Supplementary material for: Sterilization efficacy of a homemade UV lamp system on ceramic and porcelain tiles
Source: Royal Society of Chemistry journal article supplement (doi:10.1039/d4an00369a), 2024-01-01
Supplement: d4an00369a1.pdf [file d4an00369a1.pdf]

## Supplementary Information

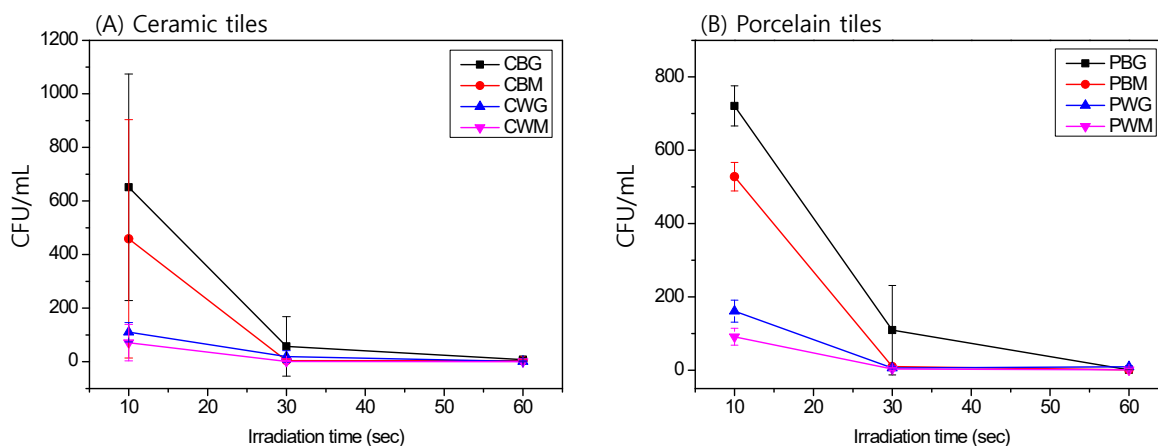

**Figure S1** Changes in CFU/mL as a function of UV irradiation time on (A) ceramic tiles and (B) porcelain tiles. The distance between the UVC light-emitting lamp and the tiles with spores adsorbed was 120 mm. CBG, CBM, CWG, CWM, PBG, PBM, PWG, and PWM stand for ceramic black glossy, ceramic black matte, ceramic white glossy, ceramic white matte, porcelain white glossy, porcelain white matte, porcelain black glossy, and porcelain black matte, respectively. Four different sample preparations were performed per each condition. The error bars represent standard deviation.

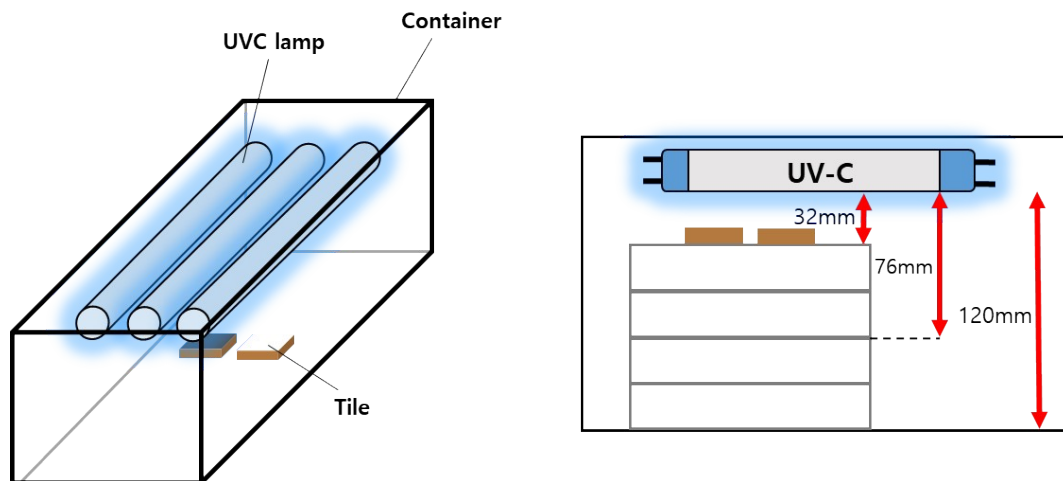

**Figure S2.** The diagram of homemade UVC lamp system

**Table S1.** Water absorption of tiles

| Tile type |              | Water absorption (%) <sup>a)</sup> |
|-----------|--------------|------------------------------------|
| Ceramic   | White matte  | 11.67±0.129                        |
|           | White glossy | 11.21±0.198                        |
|           | Black matte  | 12.82±0.084                        |
|           | Black glossy | 10.08±0.345                        |
| Porcelain | White matte  | 2.96±1.685                         |
|           | White glossy | 0.60±0.088                         |
|           | Black matte  | 0.31±0.010                         |
|           | Black glossy | 0.17±0.026                         |

<sup>a)</sup>Each tile involves three identical tile samples, providing replication for the experiment; (mean ± standard deviation)

**Table S2.** Number of colonies on (A) ceramic tiles and (B) porcelain tiles as a function of UV irradiation time at 120 mm lamp-to-tile distance

| Tile type        |              | Irradiation time (sec) <sup>a)</sup> |         |        |     |
|------------------|--------------|--------------------------------------|---------|--------|-----|
|                  |              | 0 <sup>b)</sup>                      | 10      | 30     | 60  |
| (A)<br>Ceramic   | White matte  | 15,750                               | 71±68   | 1±2    | 0±0 |
|                  | White glossy | 23,000                               | 110±36  | 19±22  | 1±2 |
|                  | Black matte  | 30,000                               | 459±445 | 4±6    | 4±3 |
|                  | Black glossy | 15,000                               | 651±423 | 57±111 | 8±7 |
| (B)<br>Porcelain | White matte  | 59,000                               | 18±5    | 1±1    | 0±1 |
|                  | White glossy | 52,000                               | 32±6    | 1±1    | 2±1 |
|                  | Black matte  | 69,000                               | 106±8   | 2±0    | 0±1 |
|                  | Black glossy | 90,000                               | 144±11  | 27±31  | 0±1 |

<sup>a)</sup>Each condition involves four identical tile samples, providing replication for the experiment; (mean ± standard deviation)

<sup>b)</sup>0 sec means positive control. The positive control was not replicated.

**Table S3.** Survival fraction of *Bacillus atrophaeus* spores on (A) ceramic tiles and (B) porcelain tiles as a function of UV irradiation time at 120 mm lamp-to-tile distance

| Tile type        |              | Irradiation time (sec) <sup>a)</sup> |            |            |            |
|------------------|--------------|--------------------------------------|------------|------------|------------|
|                  |              | 0 <sup>b)</sup>                      | 10         | 30         | 60         |
| (A)<br>Ceramic   | White matte  | 100                                  | 0.45±0.431 | 0.01±0.013 | 0±0        |
|                  | White glossy | 100                                  | 0.48±0.157 | 0.08±0.096 | 0±0.009    |
|                  | Black matte  | 100                                  | 1.53±1.482 | 0.01±0.019 | 0.01±0.011 |
|                  | Black glossy | 100                                  | 4.34±2.818 | 0.38±0.742 | 0.05±0.049 |
| (B)<br>Porcelain | White matte  | 100                                  | 0.03±0.008 | 0±0.001    | 0±0.001    |
|                  | White glossy | 100                                  | 0.06±0.012 | 0±0.001    | 0±0.001    |
|                  | Black matte  | 100                                  | 0.15±0.011 | 0±0        | 0±0.001    |
|                  | Black glossy | 100                                  | 0.16±0.012 | 0.03±0.034 | 0±0.001    |

<sup>a)</sup> Each condition involves four identical tile samples, providing replication for the experiment; (mean ± standard deviation)

<sup>b)</sup> 0 sec means positive control. The positive control was not replicated.

**Table S4.** Number of colonies on porcelain tiles according to distance between tile and UVC lamp with UV irradiation time of 10 sec

| Tile type |              | Distance (mm) <sup>a)</sup> |         |          |
|-----------|--------------|-----------------------------|---------|----------|
|           |              | 32                          | 72      | 120      |
| Porcelain | White matte  | 0±0                         | 100±41  | 913±232  |
|           | White glossy | 0±0                         | 100±41  | 1613±301 |
|           | Black matte  | 0±0                         | 475±104 | 5275±393 |
|           | Black glossy | 0±0                         | 588±315 | 7213±554 |

<sup>a)</sup> Each condition involves four identical tile samples, providing replication for the experiment; (mean ± standard deviation)
